# Supplementary material for: Identification of Main Genetic Causes Responsible for Non-Syndromic Hearing Loss in a Peruvian Population
Source: PubMed Central journal article supplement (PMC6723399; doi:10.3390/genes10080581), 2019-07-31
Supplement: genes-10-00581-s001.pdf [file genes-10-00581-s001.pdf]

## Supplementary Materials:

**Table S1.** List of SNPs used for haplotype construction.

| RS id      | Position in chromosome 13 (Build GRCh37) |
|------------|------------------------------------------|
| rs7984141  | 19,660,641                               |
| rs9578792  | 19,662,154                               |
| rs4769387  | 19,666,481                               |
| rs7320243  | 19,714,717                               |
| rs518637   | 19,732,341                               |
| rs11617480 | 20,211,434                               |
| rs7988277  | 20,411,701                               |
| rs6490494  | 20,493,020                               |
| rs7327207  | 20,494,558                               |
| rs9506408  | 20,507,957                               |
| rs1407961  | 20,572,751                               |
| rs4624004  | 20,684,742                               |
| rs2031283  | 20,687,836                               |
| rs7982556  | 20,688,590                               |
| rs1011038  | 20,695,554                               |
| rs1886176  | 20,715,801                               |
| rs9509057  | 20,723,127                               |
| rs7981756  | 20,790,742                               |
| rs7992230  | 20,848,317                               |
| rs2050500  | 20,854,763                               |
| rs1953516  | 20,881,146                               |
| rs1572371  | 20,887,860                               |
| rs4409941  | 20,951,425                               |
| rs4331204  | 20,962,029                               |
| rs4770024  | 20,995,731                               |

**Table S2.** Summary of clinical features of cases.

| Clinical features                      |                        |
|----------------------------------------|------------------------|
| <b>Age at onset</b>                    |                        |
| Mostly prelingual                      | 18.2 months [0 – 72 m] |
| <b>Sex</b>                             |                        |
| Males                                  | 69                     |
| Females                                | 64                     |
| <b>Family history</b>                  |                        |
| Multiplexcases                         | 63                     |
| Simplex cases                          | 70                     |
| <b>Level hearing loss on left ear</b>  |                        |
| Moderate                               | 2.9%                   |
| Severe                                 | 14.7%                  |
| Profound                               | 82.4%                  |
| <b>Level hearing loss on right ear</b> |                        |
| Moderate                               | 1%                     |

|          |       |
|----------|-------|
| Severe   | 13.7% |
| Profound | 85.3  |

\*Complete audiometry information was available for 102 cases. Grades of hearing loss according to WHO: Mild (26 – 40 dB), Moderate (41 – 60 dB), Severe (61 – 80 dB), Profound (Over 81 dB).

**TableS3.** Characteristics of identified *GJB2* variants.

| cDNA       | Protein       | SIFT     | Mutation Taster | GERP <sup>1</sup> | PhastCons <sup>1</sup> | gnomAD      | Reference                           | ClinVar                                      | ACMG                   |
|------------|---------------|----------|-----------------|-------------------|------------------------|-------------|-------------------------------------|----------------------------------------------|------------------------|
| c.19C>T    | p.(Gln7Ter)   | NA       | DC              | 5.36              | 0.023                  | 0.00000802  | Pandya et al. 2003                  | Pathogenic/Likely pathogenic                 | Pathogenic             |
| c.29T>C    | p.(Leu10Pro)  | DM       | DC              | 5.36              | 0.335                  | -           | Dalamón et al. 2013                 | NA                                           | Likely pathogenic      |
| c.35G>T    | p.(Gly12Val)  | 0.001/DM | DC              | 5.36              | 0.591                  | 0.00009221  | Rabionet, R. et al. 2000            | Pathogenic/Likely pathogenic                 | Pathogenic             |
| c.35delG   | p.(Gly12fs)   | NA       | NA              | 5.36              | NA                     | 0.006188    | Zelanmte, L. et al. 1997            | Pathogenic                                   | Pathogenic             |
| c.59T>C    | p.(Ile20Thr)  | 0.02/DM  | DC              | 5.21              | 0.961                  | -           | Loffler, J. et al. 2001             | Likely pathogenic                            | Likely pathogenic      |
| c.94C>A    | p.(Arg32Ser)  | 0/DM     | DC              | 5.21              | 0.8939                 | 0.000007984 | Hayashi C. et al. 2011              | Likely pathogenic                            | Likely pathogenic      |
| c.109G>A   | p.(Val37Ile)  | T        | DC              | 5.21              | 0.5149                 | 0.007556    | Kelley, P., et al. 1998             | Conflicting interpretations of pathogenicity | Likely pathogenic      |
| c.167delT  | p.(Leu56fs)   | NA       | NA              | 4.1199            | NA                     | 0.0008036   | Zelante et al. 1997                 | Pathogenic                                   | Pathogenic             |
| c.232dupG  | p.(Ala78fs)   | NA       | NA              | 5.3299            | NA                     | NA          | Putcha et al 2007                   | Likely pathogenic                            | Likely pathogenic      |
| c.235delC  | p.(Leu79fs)   | NA       | NA              | 5.3299            | -                      | 0.0004738   | Kudo T et al. 2000                  | Pathogenic                                   | Pathogenic             |
| c.283G>A   | p.(Val95Met)  | 0.001/DM | DC              | 4.2399            | 0.9959                 | 0.00004779  | Kelley, P., et al. 1998             | Pathogenic/Likely pathogenic                 | Pathogenic             |
| c.427C>T   | p.(Arg143Trp) | 0/DM     | DC              | 4.56              | 0.92                   | 0.0001311   | Brobbly, G.; Muller-Myhsok, B. 1998 | Pathogenic                                   | Pathogenic             |
| c.617A>G   | p.(Asn206Ser) | T        | DC              | 4.449             | 0.448                  | 0.0001027   | Marlin et al. 2001                  | Pathogenic                                   | Pathogenic             |
| c.645delT  | p.(Arg216fs)  | NA       | NA              | -2.96             | NA                     | NA          | Angeli 2009                         | Likely pathogenic                            | Likely pathogenic      |
| c.-15C>T   | NA            | NA       | NA              | -5.0799           | NA                     | 0.004994    | Gasmelseed NM et al. 2004           | Benign/Likely benign                         | Benign                 |
| c.79G>A    | p.(Val27Ile)  | T        | POL             | 5.21              | 0.898                  | 0.05038     | Kelley, P., et al. 1998             | Benign                                       | Benign                 |
| c.*84T>C   | NA            | NA       | NA              | 5.82              | NA                     | 0.7486      | Wilch et al. 2006                   | Benign                                       | Benign                 |
| c.*1C>T    | NA            | NA       | NA              | -3.96             | NA                     | 0.0004986   | Dalamón et al. 2010                 | Conflicting interpretations of pathogenicity | Uncertain significance |
| c.-22-6T>C | NA            | NA       | NA              | 1.74              | NA                     | 0.0004889   | Tang et al. 2006                    | Uncertain significance                       | Uncertain significance |
| c.154G>T   | p.(Val52Phe)  | DM       | POL             | -7.3499           | 0.05099                | NA          | NA                                  | NA                                           | Uncertain significance |

---

|          |               |   |    |        |        |           |                           |                                                    |                        |
|----------|---------------|---|----|--------|--------|-----------|---------------------------|----------------------------------------------------|------------------------|
| c.503A>G | p.(Lys168Arg) | T | DC | 5.4699 | 0.8399 | 0.0000531 | Samanich J et al.<br>2007 | Conflicting<br>interpretations of<br>pathogenicity | Uncertain significance |
|----------|---------------|---|----|--------|--------|-----------|---------------------------|----------------------------------------------------|------------------------|

---

**DM:** Damaging, **T:** Tolerated, **DC:** Disease Causing, **NA:** Not Available, **ACMG:** American College of Medical Genetics Guideline (Richards et al., 2015).

<sup>1</sup>PhastCons and GERP scores are obtained from SeattleSeq Annotation 138 (<http://snp.gs.washington.edu/SeattleSeqAnnotation138/>).

**Table S4.** List of *GJB2* genotypes.

| COMPOUND HETEROZYGOUS GENOTYPES |                            | PROBANDS |
|---------------------------------|----------------------------|----------|
| c.[427C>T(;);94C>A]             | p.[Arg143Trp(;);Arg32Ser]  | 5        |
| c.[427C>T(;);59T>C]             | p.[Arg143Trp(;);Ile20Thr]  | 4        |
| c.[427C>T(;);35delG]            | p.[Arg143Trp(;);Gly12fs]   | 3        |
| c.[427C>T(;);645delT]           | p.[Arg143Trp(;);Arg216fs]  | 3        |
| c.[427C>T(;);35G>T]             | p.[Arg143Trp(;);Gly12Val]  | 1        |
| c.[427C>T(;);167delT]           | p.[Arg143Trp(;);Leu56fs]   | 1        |
| c.[427C>T(;);109G>A]            | p.[Arg143Trp(;);Val37Ile]  | 1        |
| c.[427C>T(;);427C>T]            | p.[Arg143Trp(;);Arg143Trp] | 1        |
| c.[427C>T(;);19C>T]             | p.[Arg143Trp(;);Gln7Ter]   | 1        |
| c.[35delG(;);35delG]            | p.[Gly12fs(;);Gly12fs]     | 3        |
| c.[35delG(;);94C>A]             | p.[Gly12fs(;);Arg32Ser]    | 2        |
| c.[35delG(;);19C>T]             | p.[Gly12fs(;);Gln7Ter]     | 2        |
| c.[35delG(;);283G>A]            | p.[Gly12fs(;);Val95Met]    | 1        |
| c.[35G>T(;);35G>T]              | p.[Gly12Val(;);Gly12Val]   | 3        |
| c.[35G>T(;);235delC]            | p.[Gly12Val(;);Leu79fs]    | 1        |
| c.[59T>C(;);283G>A]             | p.[Ile20Thr(;);Val95Met]   | 2        |
| c.[59T>C(;);59T>C]              | p.[Ile20Thr(;);Ile20Thr]   | 1        |
| c.[645delT(;);167delT]          | p.[Arg216fs(;);Leu56fs]    | 1        |
| c.[645delT(;);283G>A]           | p.[Arg216fs(;);Val95Met]   | 1        |
| c.[645delT(;);59T>C]            | p.[Arg216fs(;);Ile20Thr]   | 1        |
| c.[94C>A(;);19C>T]              | p.[Arg32Ser(;);Gln7Ter]    | 1        |
| c.[94C>A(;);94C>A]              | p.[Arg32Ser(;);Arg32Ser]   | 1        |
| c.[109G>A(;);617A>G]            | p.[Val37Ile(;);Asn206Ser]  | 1        |
| c.[167delT(;);232dupG]          | p.[Leu56fs(;);Ala78fs]     | 1        |
| c.[19C>T(;);283G>A]             | p.[Gln7Ter(;);Val95Met]    | 1        |
| HETEROZYGOUS GENOTYPES          |                            | PROBANDS |
| c.[283G>A];[=]                  | p.[Val95Met];[=]           | 1        |
| c.[29T>C];[=]                   | p.[Leu10Pro];[=]           | 1        |
| c.[35delG];[=]                  | p.[Gly12fs];[=]            | 2        |
| c.[35G>T];[=]                   | p.[Gly12Val];[=]           | 1        |
| c.[59T>C];[=]                   | p.[Ile20Thr];[=]           | 1        |
| c.[94C>A];[=]                   | p.[Arg32Ser];[=]           | 1        |
| WILDE TYPE                      |                            | PROBANDS |
| WT                              | WT                         | 83       |

Genotypes were annotated according to HGVS (<http://www.hgvs.org/>).

**TableS5.** Causative genetic variants identified via WGS. Transcript NM\_016239.3 was used for the *MYO15A*.

| Family ID | Gene   | OMI M# | Associated Phenotype            | OMI M# | Zygosity | cDNA        | Protein              | Reference  | gnomAD | CADD | GERP RS | Mutation Taster | SIFT | ClinVar | ACMG |
|-----------|--------|--------|---------------------------------|--------|----------|-------------|----------------------|------------|--------|------|---------|-----------------|------|---------|------|
| 2641      | MYO15A | 602666 | Deafness, autosomal recessive 3 | 600316 | HM       | c.3757-2A>G | -                    | This study | NA     | 28.9 | 4.76    | DC              | NA   | NA      | LP   |
| 2726      | MYO15A | 602666 | Deafness, autosomal recessive 3 | 600316 | HT       | c.843C>A    | p.(Tyr281*)          | This study | NA     | 34   | 2.5899  | DC              | NA   | NA      | LP   |
|           |        | 602666 | Deafness, autosomal recessive 3 | 600316 | HT       | c.8798delT  | p.(Phe2933Serfs*101) | This study | NA     | 35   | 3.65    | NA              | NA   | NA      | LP   |

**HM:** Homozygous, **HT:** Heterozygous, **DC:** Disease Causing, **NA:** Not Available, **LP:** Likely Pathogenic, **VUS:** Variant of Uncertain Significance, **ACMG:** American College of Medical Genetics Guideline (Richards et al., 2015).
